# Supplementary material for: Gain–loss situation modulates neural responses to self–other decision making under risk
Source: PubMed Central journal article supplement (PMC6345784; doi:10.1038/s41598-018-37236-9), 2019-01-24
Supplement: 41598_2018_37236_MOESM1_ESM.pdf [file 41598_2018_37236_MOESM1_ESM.pdf]

# Gain–loss situation modulates neural responses to self–other decision making under risk

Xiangyi Zhang, Shijia Li, Yongfang Liu, Xiyou Chen, Xuesong Shang, Fangzhu Qi, Xiaoyan Wang, Xiuyan Guo, & Jie Chen

## Post-experiment self-report questionnaire

After the experimental task, participants were asked to answer a yes/no question:

“ Do you strongly doubt that the decisions for another person during the task were real? ”

A: Yes

B: No

(used for the exclusion of participants; see *Methods, Participants*).

**Supplementary Table 1.** Main effect of decision target (t-contrast: self–other).

| Anatomical region |   | MNI coordinates |     |     | Voxels | T-value | P-value |
|-------------------|---|-----------------|-----|-----|--------|---------|---------|
|                   |   | x               | y   | z   |        |         |         |
| ACC               | R | 12              | 45  | 9   | 485    | 7.45    | 0.000   |
| DMPFC             | L | -9              | 33  | 39  |        | 6.62    | 0.000   |
| Insula            | L | -39             | 9   | -12 | 21     | 6.06    | 0.000   |
| Caudate           | R | 15              | -15 | 21  | 5      | 5.42    | 0.002   |
| MTG               | R | 69              | -33 | -15 | 33     | 5.30    | 0.004   |

*Note.* ACC= anterior cingulate cortex, DMPFC= dorsomedial prefrontal cortex, MTG= middle temporal gyrus, L = left hemisphere, R = right hemisphere. All results were reported using whole-brain FWE corrected ( $P < 0.05$ ) at peak level.

**Supplementary Table 2.** Main effect of choice (t-contrast: sure–risky).

| Anatomical region       |   | MNI coordinates |     |     | Voxels | T-value | P-value |
|-------------------------|---|-----------------|-----|-----|--------|---------|---------|
|                         |   | x               | y   | z   |        |         |         |
| Inferior temporal gyrus | L | -54             | -12 | -27 | 253    | 7.79    | 0.000   |
| Middle orbital gyrus    | L | -3              | 48  | -12 | 261    | 7.13    | 0.000   |
| Middle frontal gyrus    | L | -33             | 9   | 60  | 139    | 7.12    | 0.000   |
| Superior temporal gyrus | L | -63             | -27 | 9   | 211    | 6.67    | 0.000   |
| Precuneus               | L | -9              | -57 | 21  | 136    | 6.11    | 0.000   |
| Middle temporal gyrus   | R | 60              | -3  | -21 | 80     | 6.05    | 0.000   |

*Note.* L = left hemisphere, R = right hemisphere. All results were reported using whole-brain FWE corrected ( $P < 0.05$ ) at peak level.
